# Supplementary material
Source: HighWire-hosted journal article supplement (https://rmdopen.bmj.com/content/8/2/e002139)
Supplement: inline-supplementary-material-1 [file inline-supplementary-material-1.pdf]

## List of supplementary

### Patients and Methods

- 1) Supplemental figure 1 : Study period definitions
- 2) Supplemental figure 2 : Definition of exposure in the main analysis
- 3) Supplemental figure 3 : Supplemental figure 3. Exposure periods and group of analysis for comparing RA patients initiating bDMARDs and matched RA patients continuing on csDMARDs alone
- 4) Supplemental table 1: Time covered by delivery for each csDMARD and bDMARD not taking into account lag or carry over period.
- 5) Supplemental table 2. Malignancy definitions according to ICD-10 codes

### Results

#### Sensitivity analyses varying carry-over period for the comparisons between RA patients initiating bDMARDs and those continuing on csDMARDs

- 6) Supplemental table 3. Risk of malignancy associated with bDMARDs initiation compared to continuing csDMARDs alone in RA patients: analysis with 2 years carry-over period.
- 7) Supplemental table 4. Risk of malignancy associated with bDMARDs initiation compared to continuing csDMARDs alone in RA patients: analysis with and 5 years carry-over period.

#### Subgroup analyses for the comparisons between RA patients initiating bDMARDs and those continuing on csDMARDs in men and women $\geq 65$ years

- 8) Supplemental table 5. Risk of malignancy associated with bDMARDs initiation compared to continuing csDMARDs alone in RA men  $\geq 65$  years: analysis with a 90-days lag period and a 180 days carry-over period.
- 9) Supplemental table 6. Risk of malignancy associated with bDMARDs initiation compared to continuing csDMARDs alone in RA women  $\geq 65$  years: analysis with a 90-days lag period and a 180 days carry-over period.

METHODS

1) Supplemental figure 1 : Study period definitions

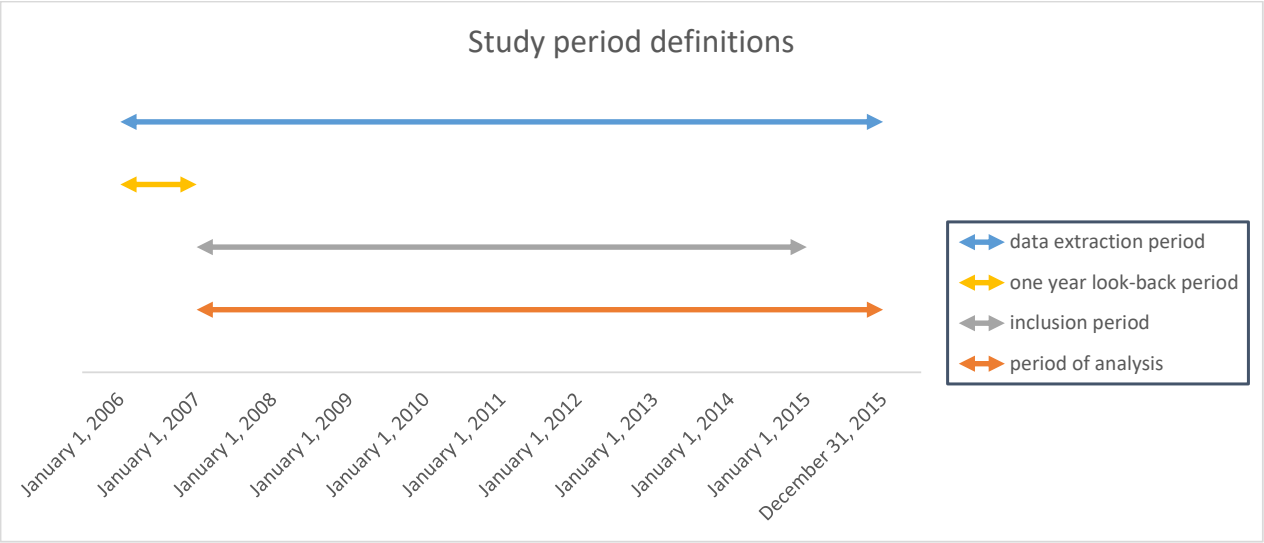

1) Supplemental figure 2 : Definition of exposure in the main analysis

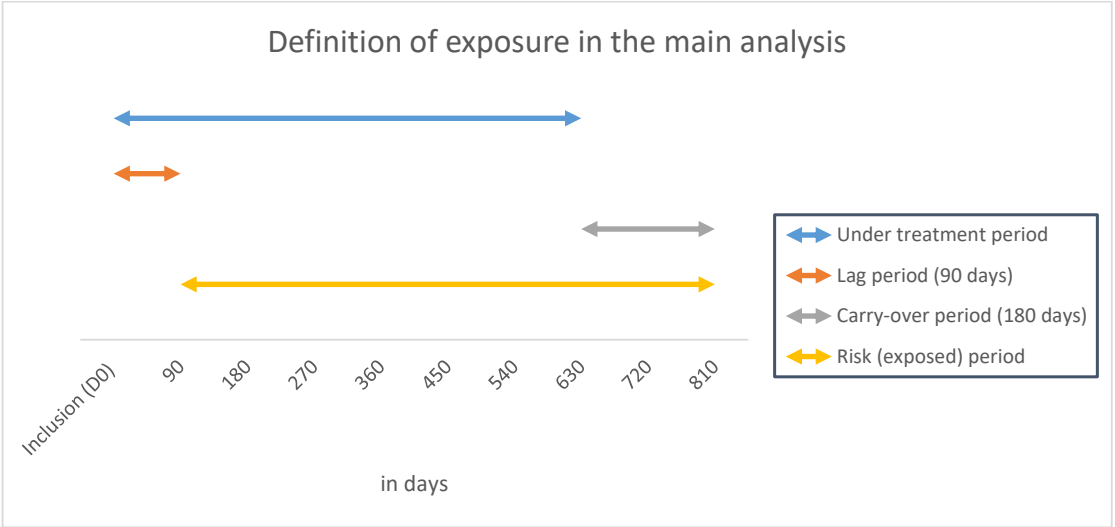

Supplemental figure 3. Exposure periods and group of analysis for comparing RA patients initiating bDMARDs and matched RA patients continuing on csDMARDs alone

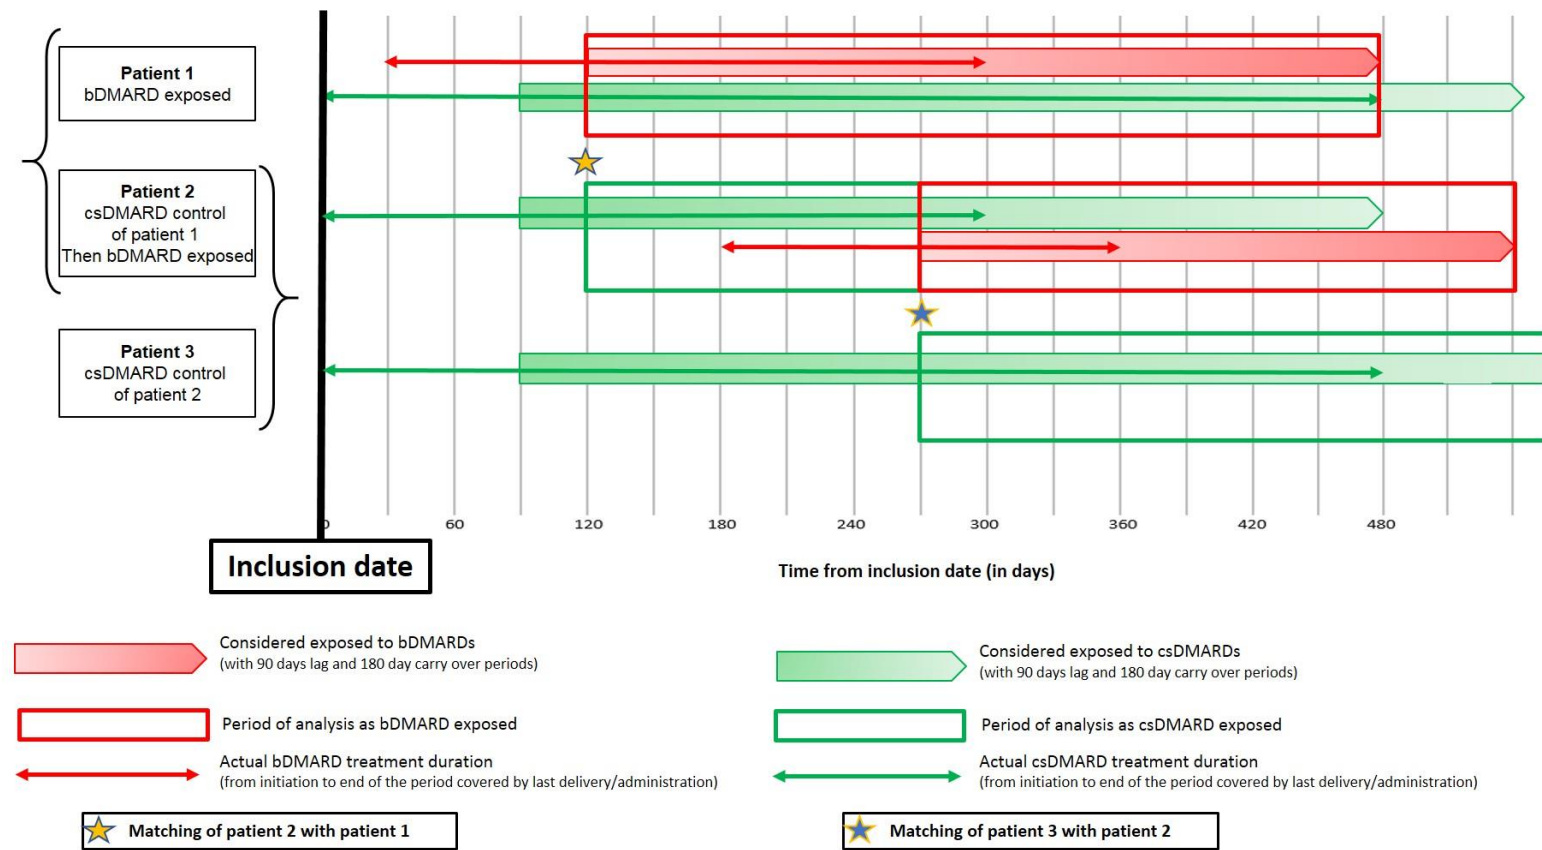



Supplemental table 1: Time covered by a delivery for each csDMARD and bDMARD not taking into account lag or carry over period.

| Treatment          | Time period covered by one delivery (days) |
|--------------------|--------------------------------------------|
| csDMARDs           |                                            |
| methotrexate       | 30                                         |
| leflunomide        | 30                                         |
| sulfasalazine      | 30                                         |
| azathioprine       | 30                                         |
| hydroxychloroquine | 30                                         |
| bDMARDs            |                                            |
| infliximab         | 60                                         |
| adalimumab         | 30                                         |
| certolizumab       | 30                                         |
| golimumab          | 30                                         |
| etanercept         | 30                                         |
| rituximab          | 180                                        |
| abatacept          | 30                                         |
| tocilizumab        | 30                                         |
| ustekinumab        | 90                                         |
| anakinra           | 30                                         |

DMARD: disease modifying anti-rheumatic agent; csDMARD: conventional synthetic DMARD; bDMARD: biologic DMARD.

**Supplemental table 2. Malignancy definitions according to ICD-10 codes**

| Malignancy                                        | ICD-10 Codes  |
|---------------------------------------------------|---------------|
| All malignancy, except non-melanoma skin cancer   | C01-C97       |
| All solid cancer, except non-melanoma skin cancer | C01-C75       |
| Hematologic malignancy                            | C81-C96       |
| Hematologic malignancy (excluding lymphoma)       | C90-C96       |
| Invasive melanoma                                 | C43           |
| Invasive cancer of the cervix                     | C53           |
| Breast cancer                                     | C50           |
| Lung cancer                                       | C33-C34       |
| Colorectal cancer                                 | C18-C21       |
| Prostate cancer                                   | C61           |
| Kidney cancer                                     | C64-C66 ; C68 |
| Hepatic cancer                                    | C22           |
| Pancreatic cancer                                 | C25           |
| Lymphoma                                          | C81-C86 ; C88 |
| Hodgkin lymphoma                                  | C81           |
| Non-Hodgkin lymphoma                              | C82-C86 ; C88 |
| Diffuse large B-cell Lymphoma                     | C83.3         |
| Follicular lymphoma                               | C82           |
| Non-follicular lymphoma                           | C83           |

## Results

### **Sensitivity analyses varying carry-over period for the comparisons between RA patients initiating bDMARDs and those continuing on csDMARDs alone**



**Supplemental table 3. Risk of malignancy associated with bDMARDs initiation compared to continuing csDMARDs alone in RA patients: analysis with a 2 years carry-over period.**

| Type of malignancy                                        | Sex   | No. of bDMARD exposed/<br>csDMARD matched RA | No. of cancer in bDMARD<br>exposed patients | No. of cancer in csDMARD<br>matched patients | HR   | CI 95%(HR)   | P-value |
|-----------------------------------------------------------|-------|----------------------------------------------|---------------------------------------------|----------------------------------------------|------|--------------|---------|
| All malignancies excluding non-melanoma skin cancer       |       | 19764-19764                                  | 592                                         | 420                                          | 1.07 | [0.94;1.21]  | 0.293   |
| All solid malignancies excluding non-melanoma skin cancer |       | 19764-19764                                  | 502                                         | 373                                          | 1.02 | [0.89;1.17]  | 0.777   |
| Hematologic malignancies                                  |       | 19764-19764                                  | 69                                          | 34                                           | 1.53 | [1.02;2.31]  | 0.035   |
| Malignant lymphoma                                        |       | 19764-19764                                  | 39                                          | 17                                           | 1.70 | [0.97;3.00]  | 0.052   |
| Hodgkin lymphoma                                          |       | 19764-19764                                  | 2                                           | 0                                            | NE   | NE           | NE      |
| Non-Hodgkin lymphoma                                      |       | 19764-19764                                  | 37                                          | 17                                           | 1.61 | [0.90;2.87]  | 0.092   |
| Hematologic malignancies (excluding lymphoma)             |       | 19764-19764                                  | 30                                          | 17                                           | 1.36 | [0.74;2.49]  | 0.307   |
| Invasive melanoma                                         |       | 19764-19764                                  | 27                                          | 19                                           | 1.07 | [0.60;1.91]  | 0.807   |
| Invasive cancer of the cervix                             | Women | 14749-14749                                  | 8                                           | 11                                           | 0.60 | [0.24;1.49]  | 0.277   |
| Breast cancer                                             | Women | 14749-14749                                  | 107                                         | 88                                           | 0.91 | [0.69;1.21]  | 0.531   |
| Lung cancer                                               |       | 19764-19764                                  | 77                                          | 54                                           | 1.09 | [0.77;1.54]  | 0.628   |
| Colo-rectal cancer                                        |       | 19764-19764                                  | 54                                          | 37                                           | 1.09 | [0.72;1.67]  | 0.680   |
| Prostate cancer                                           | Men   | 5015-5015                                    | 35                                          | 34                                           | 0.78 | [0.49;1.24]  | 0.296   |
| Kidney cancer                                             |       | 19764-19764                                  | 15                                          | 19                                           | 0.62 | [0.31;1.24]  | 0.182   |
| Liver cancer                                              |       | 19764-19764                                  | 9                                           | 2                                            | 3.43 | [0.79;14.96] | 0.059   |
| Pancreas cancer                                           |       | 19764-19764                                  | 16                                          | 8                                            | 1.44 | [0.62;3.36]  | 0.376   |

DMARD: disease modifying anti-rheumatic agent; csDMARD: conventional synthetic DMARD; bDMARD: biologic DMARD.

Supplemental table 4. Risk of malignancy associated with bDMARDs initiation compared to continuing csDMARDs alone in RA patients: analysis with 5 years carry-over period.

| Type of malignancy                                        | Sex   | No. of bDMARD exposed/ csDMARD matched RA | No. of cancer in bDMARD exposed patients | No. of cancer in csDMARD matched patients | HR   | CI 95%(HR)  | P-value |
|-----------------------------------------------------------|-------|-------------------------------------------|------------------------------------------|-------------------------------------------|------|-------------|---------|
| All malignancies excluding non-melanoma skin cancer       |       | 19790-19790                               | 663                                      | 501                                       | 1.07 | [0.96;1.21] | 0.221   |
| All solid malignancies excluding non-melanoma skin cancer |       | 19790-19790                               | 563                                      | 440                                       | 1.04 | [0.92;1.18] | 0.547   |
| Hematologic malignancies                                  |       | 19790-19790                               | 76                                       | 52                                        | 1.19 | [0.83;1.69] | 0.335   |
| Malignant lymphoma                                        |       | 19790-19790                               | 42                                       | 27                                        | 1.26 | [0.78;2.03] | 0.334   |
| Hodgkin lymphoma                                          |       | 19790-19790                               | 2                                        | 5                                         | 0.36 | [0.07;1.85] | 0.213   |
| Non-Hodgkin lymphoma                                      |       | 19790-19790                               | 40                                       | 22                                        | 1.46 | [0.87;2.45] | 0.146   |
| Hematologic malignancies (excluding lymphoma)             |       | 19790-19790                               | 34                                       | 25                                        | 1.11 | [0.66;1.88] | 0.698   |
| Invasive melanoma                                         |       | 19790-19790                               | 31                                       | 22                                        | 1.14 | [0.66;1.95] | 0.639   |
| Invasive cancer of the cervix                             | Women | 14758-14758                               | 9                                        | 5                                         | 1.51 | [0.50;4.58] | 0.457   |
| Breast cancer                                             | Women | 14758-14758                               | 118                                      | 105                                       | 0.92 | [0.71;1.19] | 0.533   |
| Lung cancer                                               |       | 19790-19790                               | 92                                       | 59                                        | 1.25 | [0.90;1.73] | 0.174   |
| Colo-rectal cancer                                        |       | 19790-19790                               | 60                                       | 40                                        | 1.22 | [0.82;1.82] | 0.319   |
| Prostate cancer                                           | Men   | 5032-5032                                 | 39                                       | 44                                        | 0.71 | [0.47;1.09] | 0.120   |
| Kidney cancer                                             |       | 19790-19790                               | 16                                       | 24                                        | 0.56 | [0.29;1.06] | 0.076   |
| Liver cancer                                              |       | 19790-19790                               | 9                                        | 3                                         | 2.43 | [0.67;8.75] | 0.143   |
| Pancreas cancer                                           |       | 19790-19790                               | 17                                       | 10                                        | 1.36 | [0.63;2.94] | 0.429   |

DMARD: disease modifying anti-rheumatic agent; csDMARD: conventional synthetic DMARD; bDMARD: biologic DMARD.

**Supplemental table 5. Risk of malignancy associated with bDMARDs initiation compared to continuing csDMARDs alone in RA men ≥65 years: analysis with a 90-days lag period and a 180 days carry-over period.**

| Type of malignancy                                        | No. of bDMARD exposed/ csDMARD matched RA | No. of cancer in bDMARD exposed patients | No. of cancer in csDMARD matched patients | HR   | CI 95%(HR)  | P-value |
|-----------------------------------------------------------|-------------------------------------------|------------------------------------------|-------------------------------------------|------|-------------|---------|
| All malignancies excluding non-melanoma skin cancer       | 843-843                                   | 48                                       | 40                                        | 1.04 | [0.68;1.59] | 0.866   |
| All solid malignancies excluding non-melanoma skin cancer | 843-843                                   | 40                                       | 32                                        | 1.08 | [0.67;1.73] | 0.753   |
| Hematologic malignancies                                  | 843-843                                   | 6                                        | 5                                         | 1.04 | [0.32;3.40] | 0.948   |
| Malignant lymphoma                                        | 843-843                                   | 5                                        | 3                                         | 1.44 | [0.34;6.01] | 0.610   |

**Supplemental table 6. Risk of malignancy associated with bDMARDs initiation compared to continuing csDMARDs alone in RA women ≥65 years: analysis with a 90-days lag period and a 180 days carry-over period.**

| Type of malignancy                                        | No. of bDMARD exposed/ csDMARD matched RA | No. of cancer in bDMARD exposed patients | No. of cancer in csDMARD matched patients | HR   | CI 95%(HR)  | P-value |
|-----------------------------------------------------------|-------------------------------------------|------------------------------------------|-------------------------------------------|------|-------------|---------|
| All malignancies excluding non-melanoma skin cancer       | 2541-2541                                 | 69                                       | 61                                        | 0.96 | [0.68;1.36] | 0.819   |
| All solid malignancies excluding non-melanoma skin cancer | 2541-2541                                 | 61                                       | 54                                        | 0.95 | [0.66;1.38] | 0.801   |
| Hematologic malignancies                                  | 2541-2541                                 | 5                                        | 6                                         | 0.74 | [0.22;2.47] | 0.624   |
| Malignant lymphoma                                        | 2541-2541                                 | 3                                        | 4                                         | 0.67 | [0.15;3.05] | 0.610   |
